# Supplementary material for: Electrophoretic mobility confirms reassortment bias among geographic isolates of segmented RNA phages
Source: Springer Nature journal article supplement (doi:10.1186/1471-2148-13-206), 2013-01-01

CA65d

KRI289

(A) Mobility of Environmental Isolate

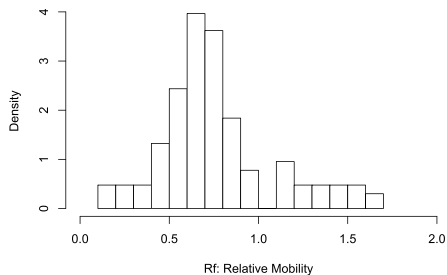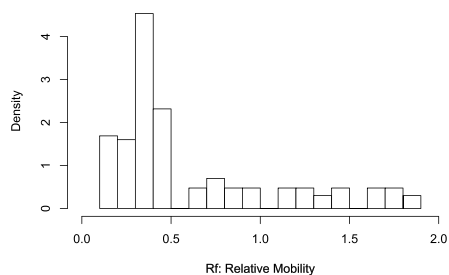

(B) Mobility of phi6-Fast1

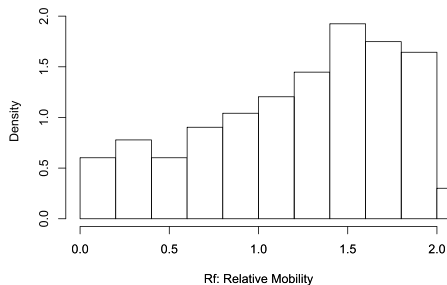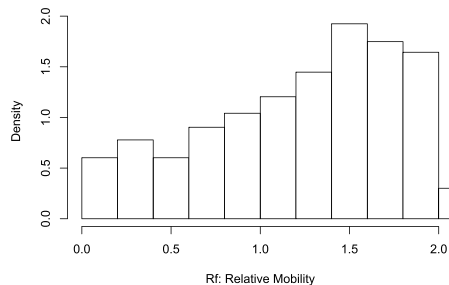

(C) Mobility of single burst lysate from cross

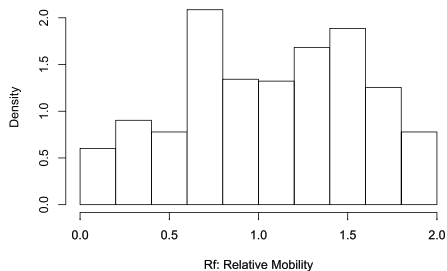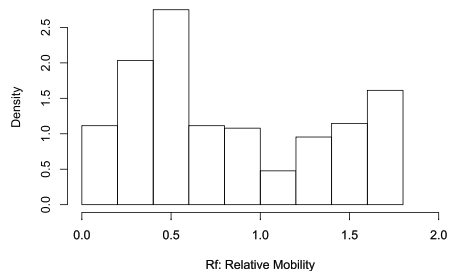

(D) Mixture model to determine proportions of components

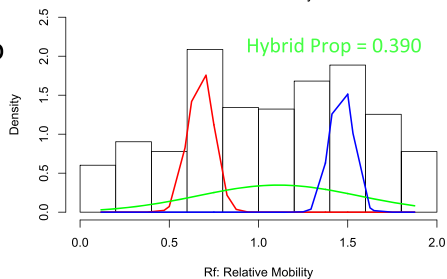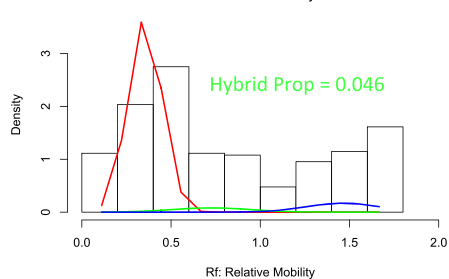

Supplement: 12862_2013_2436_MOESM5_ESM.pdf [file 12862_2013_2436_MOESM5_ESM.pdf]
