# Supplementary figures and images for: Electrophoretic mobility confirms reassortment bias among geographic isolates of segmented RNA phages
Source: Springer Nature journal article supplement (doi:10.1186/1471-2148-13-206), 2013-01-01

$\phi 6$  Electrophoretic Mobility (unmanipulated)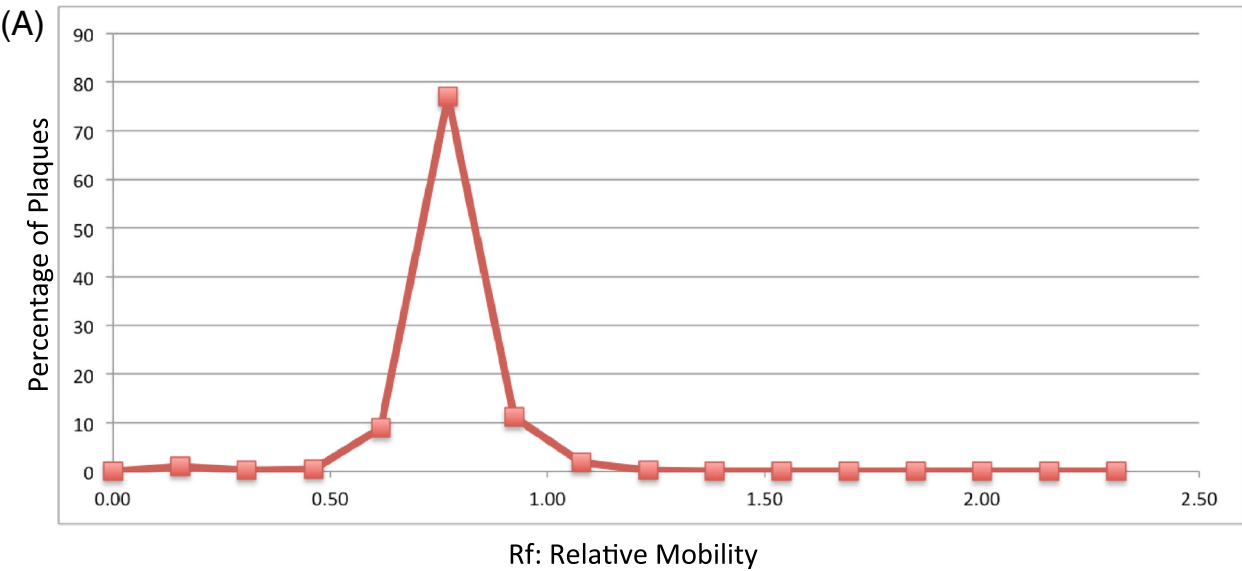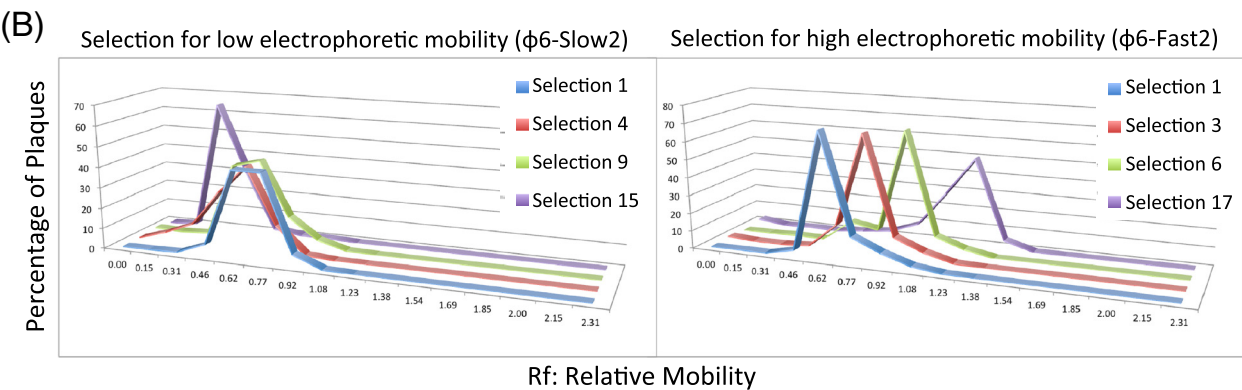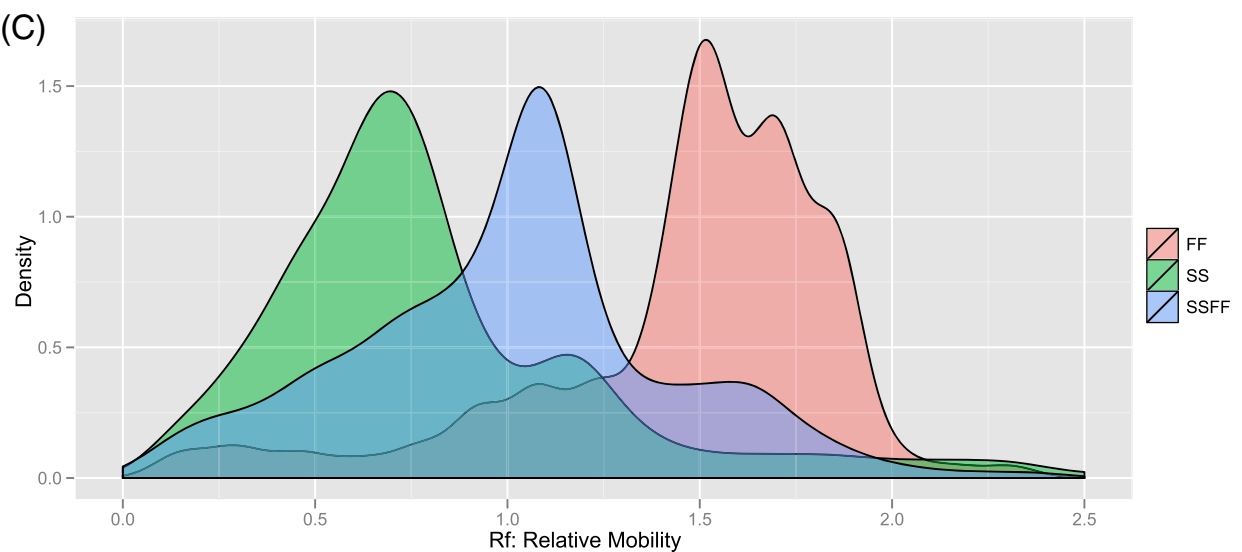

Supplement: 12862_2013_2436_MOESM1_ESM.pdf [file 12862_2013_2436_MOESM1_ESM.pdf]

Small

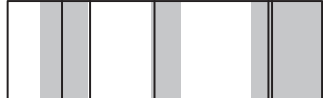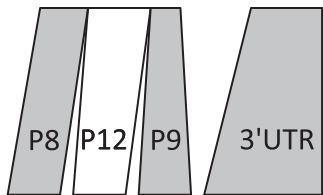

F1

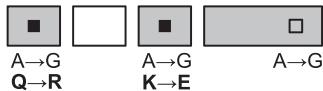

F2

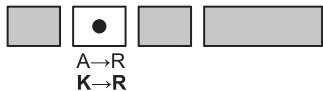

S1

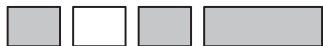

S2

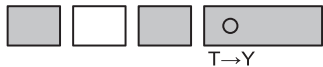

510

773

1377

2445

2479

Medium

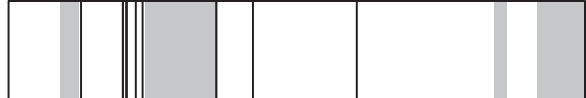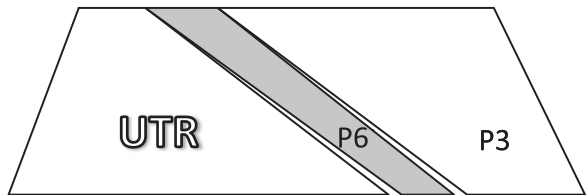

F1

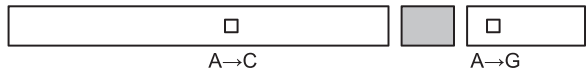

F2

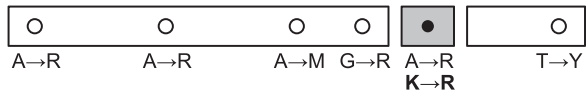

S1

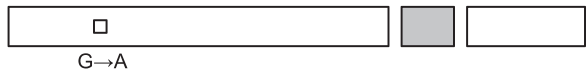

S2

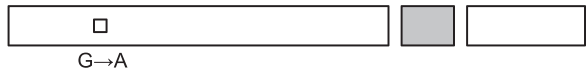

511

806

829

834

897

945

1464

1723

2455

Supplement: 12862_2013_2436_MOESM2_ESM.pdf [file 12862_2013_2436_MOESM2_ESM.pdf]

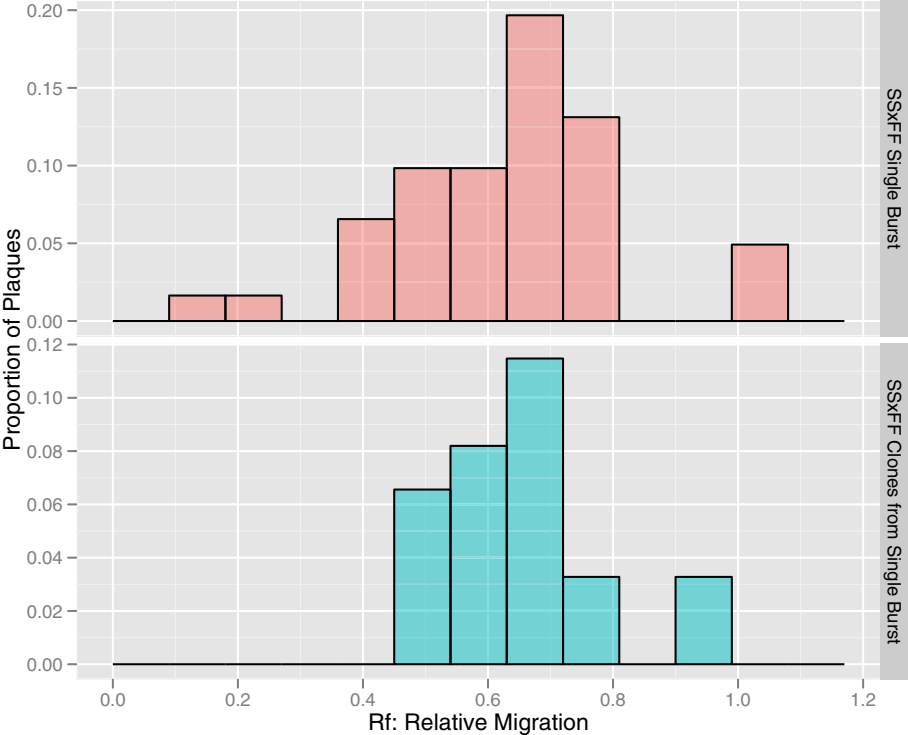

Supplement: 12862_2013_2436_MOESM3_ESM.pdf [file 12862_2013_2436_MOESM3_ESM.pdf]

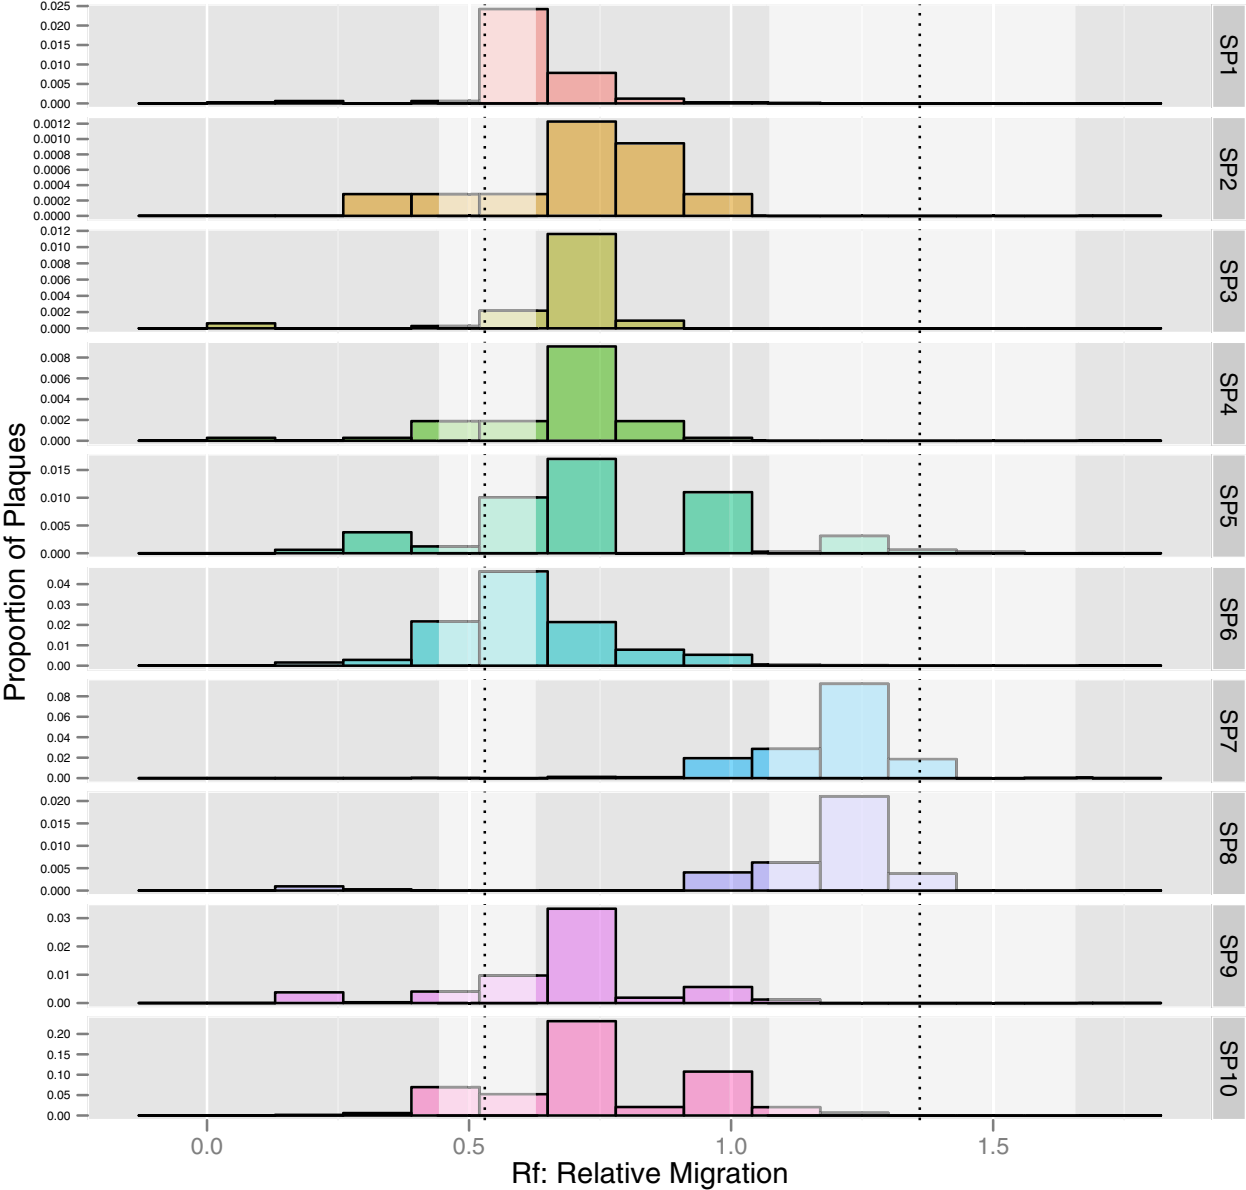

Supplement: 12862_2013_2436_MOESM4_ESM.pdf [file 12862_2013_2436_MOESM4_ESM.pdf]

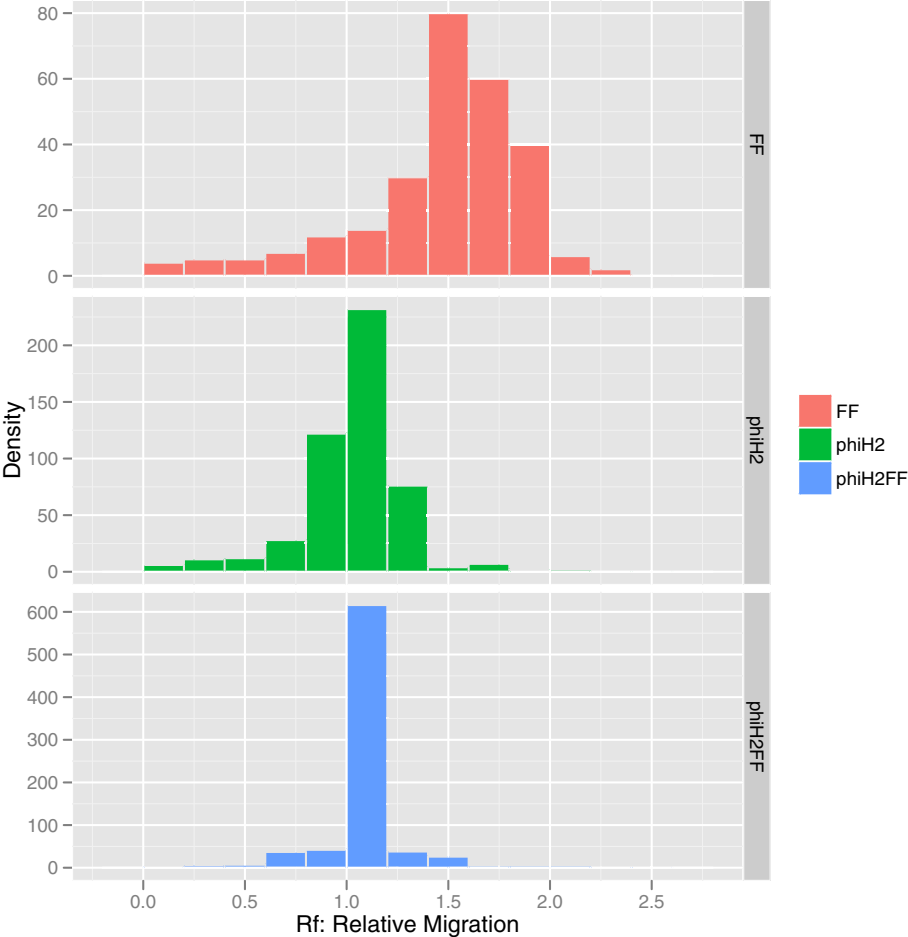

Supplement: 12862_2013_2436_MOESM6_ESM.pdf [file 12862_2013_2436_MOESM6_ESM.pdf]

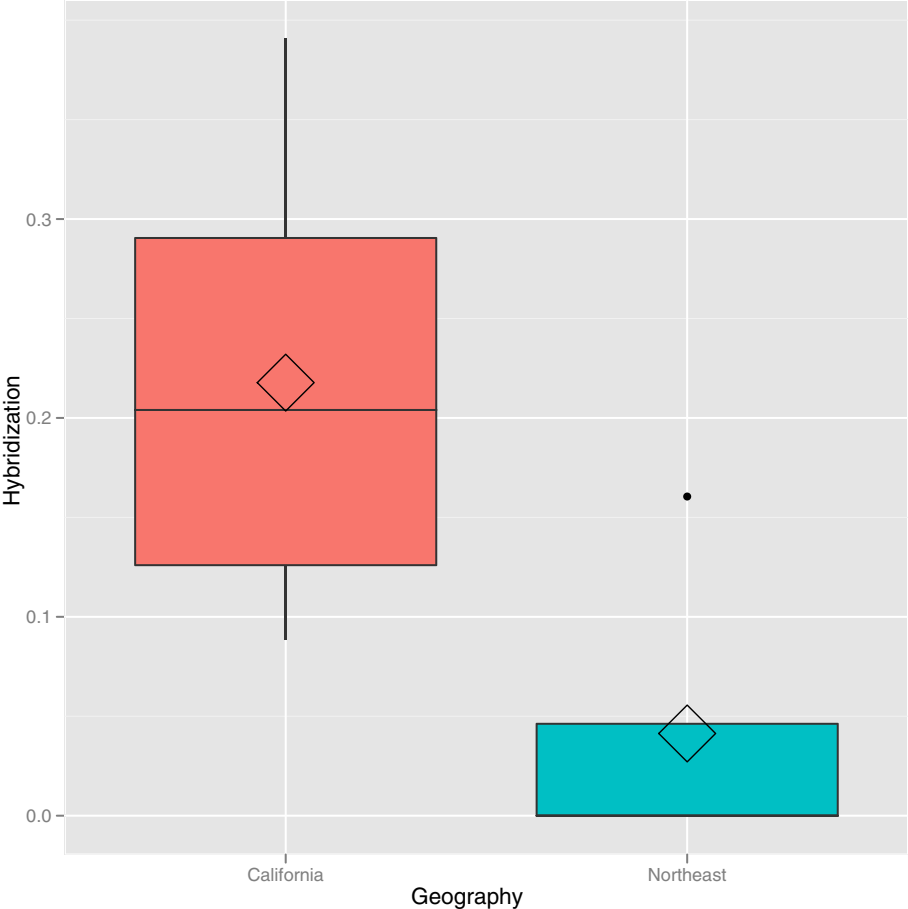

Supplement: 12862_2013_2436_MOESM7_ESM.pdf [file 12862_2013_2436_MOESM7_ESM.pdf]
